# Supplementary material for: Phage Therapy Experience at the Eliava Phage Therapy Center: Three Cases of Bacterial Persistence
Source: MDPI journal article supplement (doi:10.3390/v13101901), 2021-09-23
Supplement: s1 [file s1]

## Phage therapy experience at the Eliava Phage Therapy Center: three cases of bacterial persistence: Supplementary material

Determination of bacterial load (CFU/ml) in each specimen is a part of routine bacteriological analysis done at Eliava Analytical-Diagnostic Center. This information is then provided to the clinicians.

**Table S1.** Bacterial load in bacteriological samples of patient #1 is given in colony forming units (CFU) per mL.

| Culture collection date | <i>P. aeruginosa</i>      | Other bacteria                                                                               |
|-------------------------|---------------------------|----------------------------------------------------------------------------------------------|
| 09.01.2017              | 5x10 <sup>5</sup> CFU/ml  | N/A                                                                                          |
| 24.01.2017              | 5x10 <sup>4</sup> CFU/ml  | <i>S. mitis</i> : 1x10 <sup>8</sup> CFU/ml                                                   |
| 03.04.2017              | 1x10 <sup>5</sup> CFU/ml  | <i>S. mitis</i> : 5x10 <sup>6</sup> CFU/ml, <i>S. aureus</i> : 1x10 <sup>6</sup> CFU/ml      |
| 23.09.2017              | 1x10 <sup>6</sup> CFU /ml | <i>S. aureus</i> : 5x10 <sup>6</sup> CFU/ml                                                  |
| 17.09.2018              | 1x10 <sup>6</sup> CFU/ml  | <i>S. mitis</i> : 1x10 <sup>6</sup> CFU/ml                                                   |
| 15.01.2019              | 1x10 <sup>6</sup> CFU/ml  | <i>S. mitis</i> : 1x10 <sup>5</sup> CFU/ml, <i>S. chromogenes</i> : 1x10 <sup>6</sup> CFU/ml |
| 01.10.2019              | 1x10 <sup>4</sup> CFU/ml  | <i>S. aureus</i> : 5x10 <sup>5</sup> CFU/ml                                                  |

**Table S2.** Antibiotic susceptibility information for *P. aeruginosa* strains of patient #1. Only those antibiotics are shown, to which changes in susceptibility have been observed.

| Strain collected on | Cefepime | Meropenem | Ciprofloxacin | Levofloxacin | Amikacin | Tobramycin | Netilmicin |
|---------------------|----------|-----------|---------------|--------------|----------|------------|------------|
| 09.01.2017          | S        | S         | R             | R            | I        | R          | R          |
| 24.01.2017          | R        | S         | R             | R            | R        | R          | R          |
| 03.04.2017a         | S        | S         | S             | S            | S        | S          | S          |
| 03.04.2017b         | S        | S         | R             | R            | R        | R          | R          |
| 23.09.2017          | S        | I         | R             | R            | S        | S          | S          |
| 17.09.2018          | S        | S         | R             | R            | S        | S          | S          |
| 15.01.2019          | S        | S         | S             | S            | S        | S          | S          |
| 01.10.2019          | S        | S         | R             | R            | S        | S          | S          |

**Table S3.** Bacterial load in bacteriological samples of patient #3 is given in colony forming units (CFU) per mL.

| Culture collection date (source) | <i>K. pneumoniae</i>     | Other bacteria                                                                                  |
|----------------------------------|--------------------------|-------------------------------------------------------------------------------------------------|
| 08.01.2018 (urine)               | Information unavailable  |                                                                                                 |
| 26.03.2018 (urine)               | 1x10 <sup>8</sup> CFU/ml | N/A                                                                                             |
| 26.06.2018 (urine)               | 1x10 <sup>6</sup> CFU/ml | <i>E. faecalis</i> : >1x10 <sup>3</sup> CFU/ml                                                  |
| 26.06.2018 (vaginal swab)        | 3x10 <sup>3</sup> CFU/ml | <i>E. faecalis</i> : 1x10 <sup>5</sup> CFU/ml, <i>E. coli</i> : 5x10 <sup>4</sup> CFU/ml        |
| 06.07.2018 (urine)               | Not present              | <i>E. faecalis</i> : >1x10 <sup>3</sup> CFU/ml                                                  |
| 09.07.2018 (urine)               | 1x10 <sup>6</sup> CFU/ml | N/A                                                                                             |
| 09.10.2018 (urine)               | 5x10 <sup>6</sup> CFU/ml | N/A                                                                                             |
| 09.10.2018 (vaginal swab)        | 1x10 <sup>8</sup> CFU/ml | <i>S. epidermidis</i> : 5x10 <sup>6</sup> CFU/ml, <i>E. faecalis</i> : 1x10 <sup>8</sup> CFU/ml |
| 09.01.2019 (urine)               | 5x10 <sup>6</sup> CFU/ml | N/A                                                                                             |

|                           |                          |                                               |
|---------------------------|--------------------------|-----------------------------------------------|
| 09.01.2019 (vaginal swab) | 1x10 <sup>5</sup> CFU/ml | <i>E. faecalis</i> : 1x10 <sup>5</sup> CFU/ml |
| 23.04.2019 (urine)        | 1x10 <sup>6</sup> CFU/ml | N/A                                           |
| 23.04.2019 (vaginal swab) | 5x10 <sup>4</sup> CFU/ml | <i>E. faecalis</i> : 5x10 <sup>4</sup> CFU/ml |
| 12.07.2019 (urine)        | 1x10 <sup>8</sup> CFU/ml | N/A                                           |
| 12.07.2019 (vaginal swab) | 1x10 <sup>8</sup> CFU/ml | <i>E. coli</i> : 1x10 <sup>8</sup> CFU/ml     |

Disc diffusion methodology was employed for antibiotic susceptibility testing. Selection of antibiotic discs as well as interpretation of the results was done according to latest EUCAST recommendations. R – resistance, I – intermediate sensitivity, S – sensitivity.

**Table S4.** Bacterial load in bacteriological samples of patient #2 is given in colony forming units (CFU) per mL.

| Culture collection date | <i>P. aeruginosa</i>           | Other bacteria                                                                                                                                                         |
|-------------------------|--------------------------------|------------------------------------------------------------------------------------------------------------------------------------------------------------------------|
| 18.06.2018              | 1x10 <sup>6</sup> CFU/ml       | N/A                                                                                                                                                                    |
| 19.06.2018              | 1x10 <sup>5</sup> CFU/ml       | <i>S. aureus</i> : >1x10 <sup>3</sup> CFU/ml                                                                                                                           |
| 02.07.2018              | No <i>P.aeruginosa</i> present | <i>Ralstonia pickettii</i> : 1x10 <sup>6</sup> CFU/ml, <i>Staphylococcus aureus</i> : 3x10 <sup>3</sup> CFU/ml, <i>Streptococcus oralis</i> : 3x10 <sup>3</sup> CFU/ml |
| 19.11.2018              | 5x10 <sup>6</sup> CFU/ml       | N/A                                                                                                                                                                    |
| 11.03.2019              | 5x10 <sup>6</sup> CFU/ml       | <i>S. aureus</i> : 3x10 <sup>3</sup> CFU/ml                                                                                                                            |
| 31.07.2019              | 1x10 <sup>6</sup> CFU/ml       | <i>S. oralis</i> : 5x10 <sup>4</sup> CFU/ml                                                                                                                            |
| 02.09.2019              | 1x10 <sup>5</sup> CFU/ml       | N/A                                                                                                                                                                    |

**Table S5.** Antibiotic susceptibility information for *K. pneumoniae* strains of patient #3. Only those antibiotics are shown, to which changes in susceptibility have been observed. (u) – urine isolates, (v) – vaginal isolates.

| Strain collected on (source) | Ertapenem | Meropenem | Aztreonam | Tobramycin | Chloramphenicol | Trimethoprim /sulfamethoxazole |
|------------------------------|-----------|-----------|-----------|------------|-----------------|--------------------------------|
| 08.01.2018 (u)               | R         | I         | R         | S          | S               | S                              |
| 26.03.2018 (u)               | S         | S         | R         | I          | R               | R                              |
| 26.06.2018 (u)               | S         | S         | R         | I          | R               | R                              |
| 26.06.2018 (v)               | S         | S         | R         | I          | R               | R                              |
| 09.07.2018 (u)               | S         | S         | R         | R          | R               | R                              |
| 09.10.2018 (u)               | R         | I         | R         | I          | S               | R                              |
| 09.10.2018 (v)               | S         | S         | R         | R          | S               | R                              |
| 09.01.2019 (u)               | R         | I         | R         | S          | S               | S                              |
| 09.01.2019 (u)               | R         | I         | R         | S          | S               | S                              |
| 09.01.2019 (v)               | S         | I         | I         | I          | S               | R                              |
| 09.01.2019 (v)               | R         | I         | R         | R          | S               | R                              |
| 23.04.2019 (u)               | R         | I         | R         | I          | R               | R                              |
| 23.04.2019 (v)               | R         | I         | I         | I          | S               | R                              |
| 12.07.2019 (u)               | R         | S         | R         | S          | R               | S                              |
| 12.07.2019 (v)               | R         | I         | R         | S          | R               | S                              |

No changes in antibiotic susceptibility were observed in any of the *P. aeruginosa* strains of patient #2.

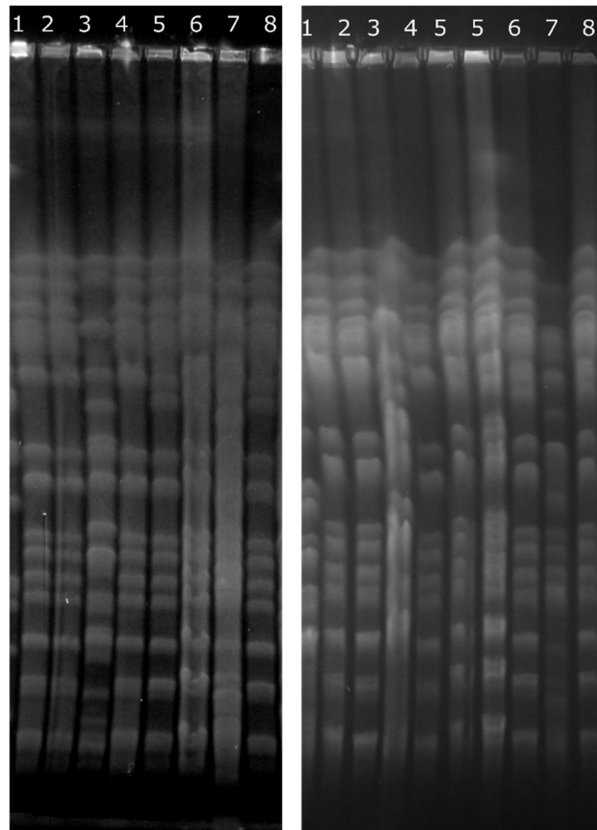

**Figure S1.** Fragments of two PFGE gel pictures of *SpeI* digested total DNA of *P. aeruginosa* strains of patient #1. 1-8: *P. a.* sputum isolates from 09.01.2017 (1), 24.01.2017 (2), 03.04.2017 (3), 03.04.2017 (4), 23.09.2017 (5), 17.09.2018 (6), 15.01.2019 (7) and 01.10.2019 (8).

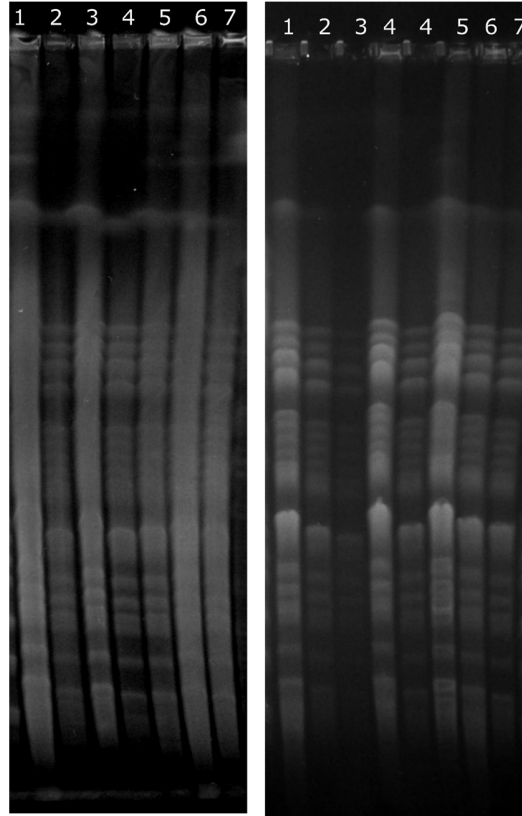

**Figure S2.** Fragments of two PFGE gel pictures of *SpeI* digested total DNA of *P. aeruginosa* strains of patient #2. 1, 3-7: *P. a.* sputum isolates from 18.06.2018 (1), 19.11.2018 (3), 11.03.2019 (4), 31.07.2019a (5), 31.07.2019b (6) and 02.09.2019 (7). 2: *P. a.* nose swab isolate from 19.06.2018.

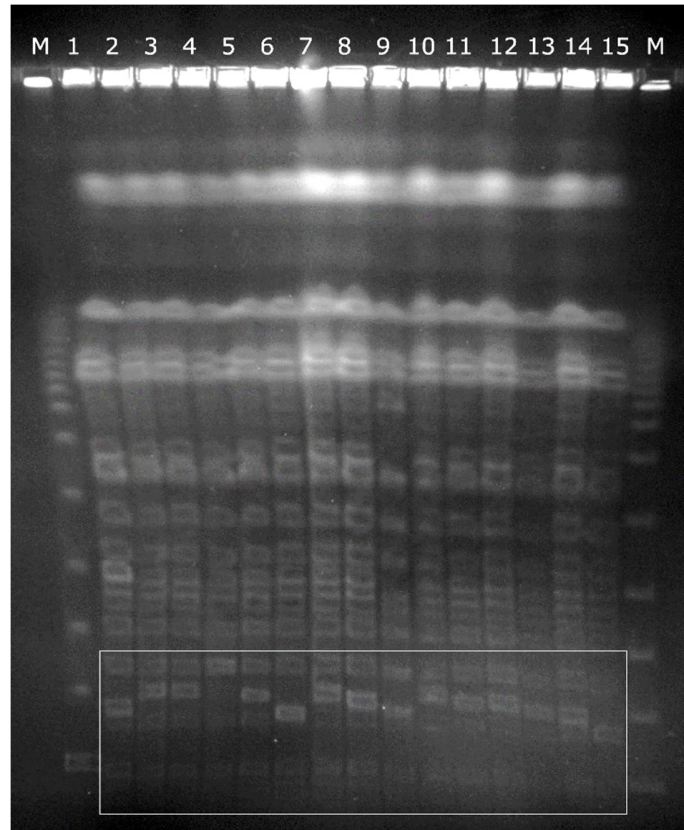

**Figure S3.** PFGE gel picture of *Xba*I digested total DNA of *K. pneumoniae* strains of patient #3. M: Lambda PFG ladder (NEB); 1-9: *K. p.* urine isolates from 08.01.2018 (1), 26.03.2018 (2), 26.06.2018 (3), 09.07.2018 (4), 09.10.2018 (5), 09.01.2019(6), 09.01.2019 (7), 23.04.2019 (8) and 12.07.2019 (9); 10-15: *K. p.* vaginal isolates from 26.06.2018 (10), 09.10.2018 (11), 09.01.2019 (12), 09.01.2019 (13), 23.04.2019 (14) and 12.07.2019 (15). Main differences stemmed from low molecular weight fragments (boxed).
